# Supplementary material for: Oral Challenge with Wild-Type Salmonella Typhi Induces Distinct Changes in B Cell Subsets in Individuals Who Develop Typhoid Disease
Source: PubMed Central journal article supplement (PMC4907489; doi:10.1371/journal.pntd.0004766), 2016-06-14

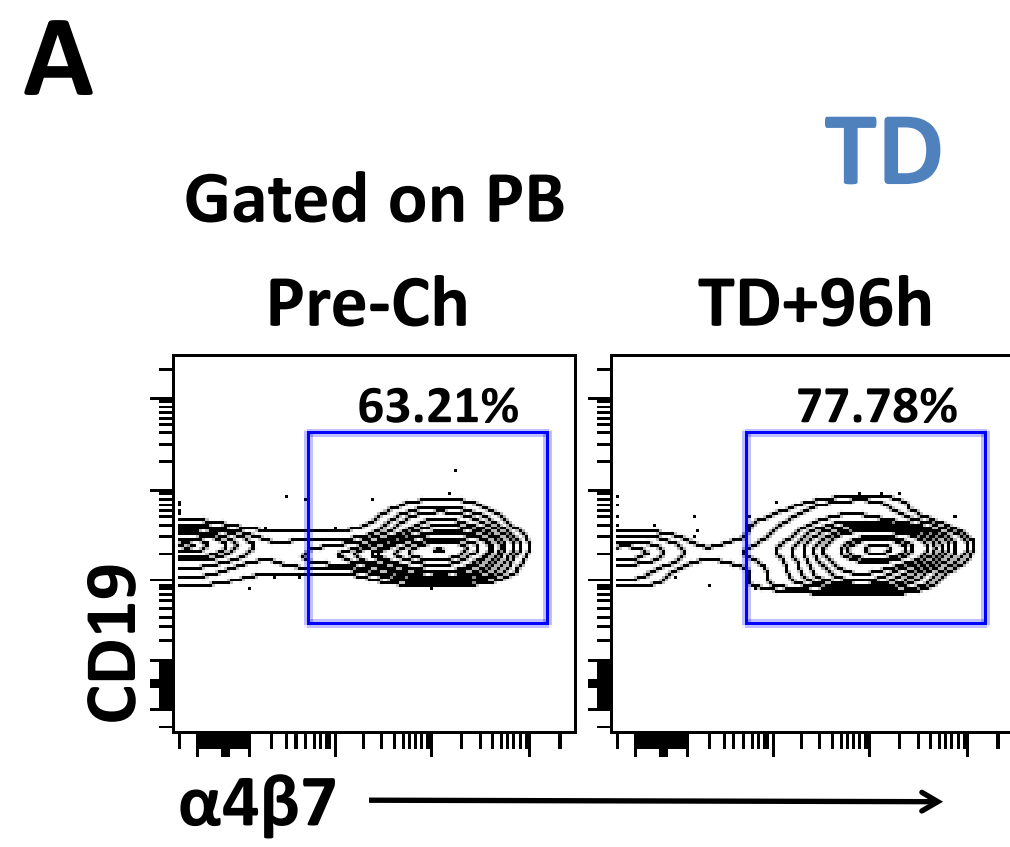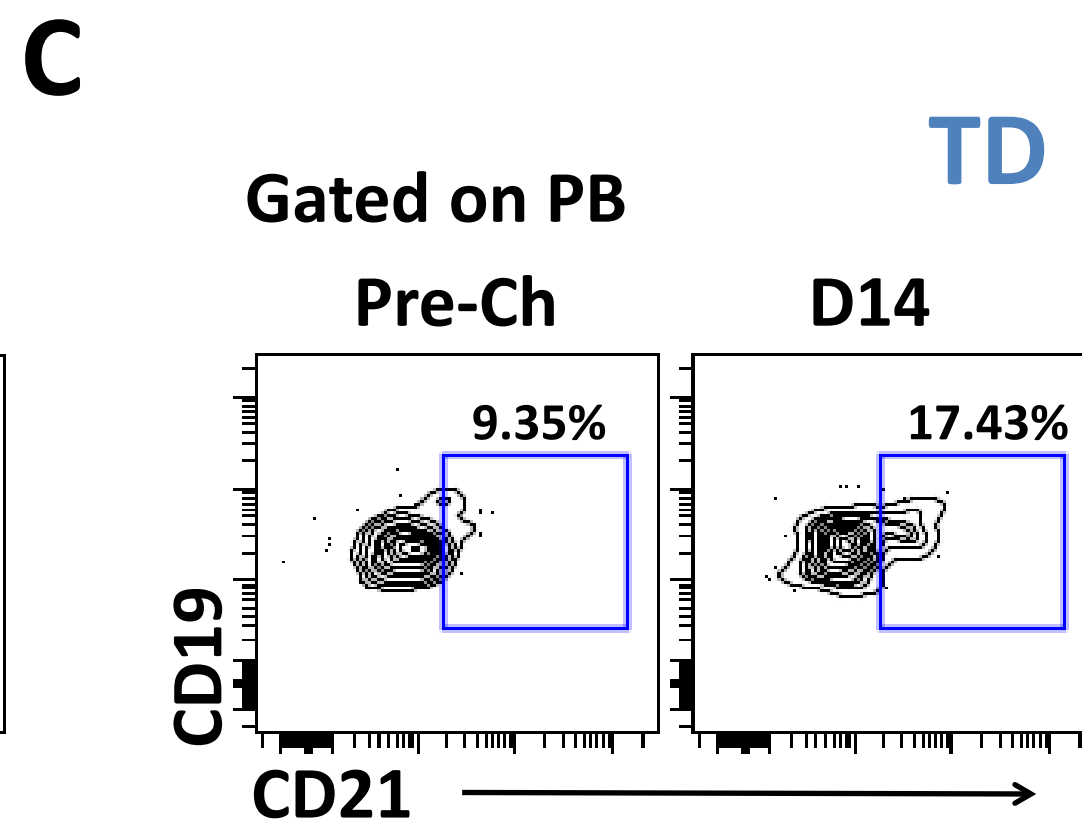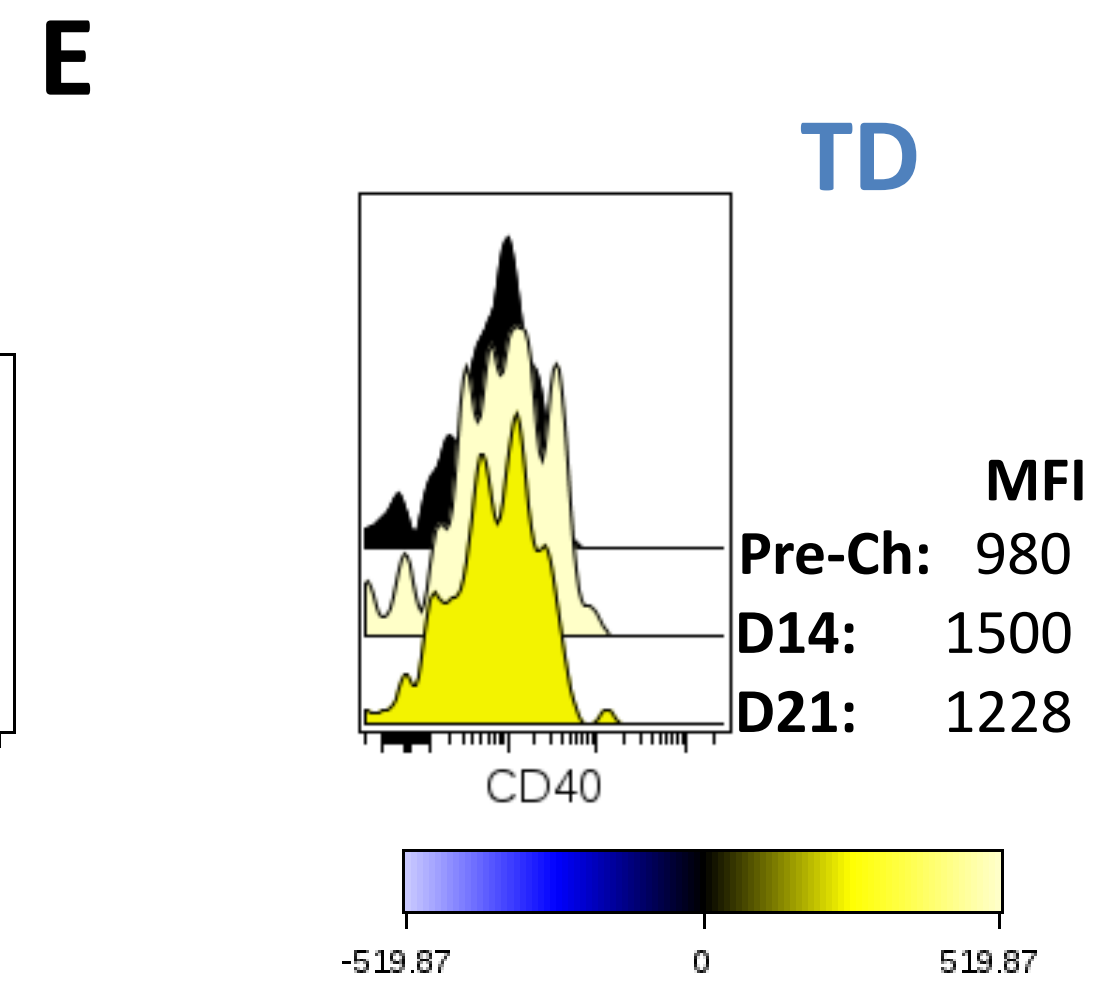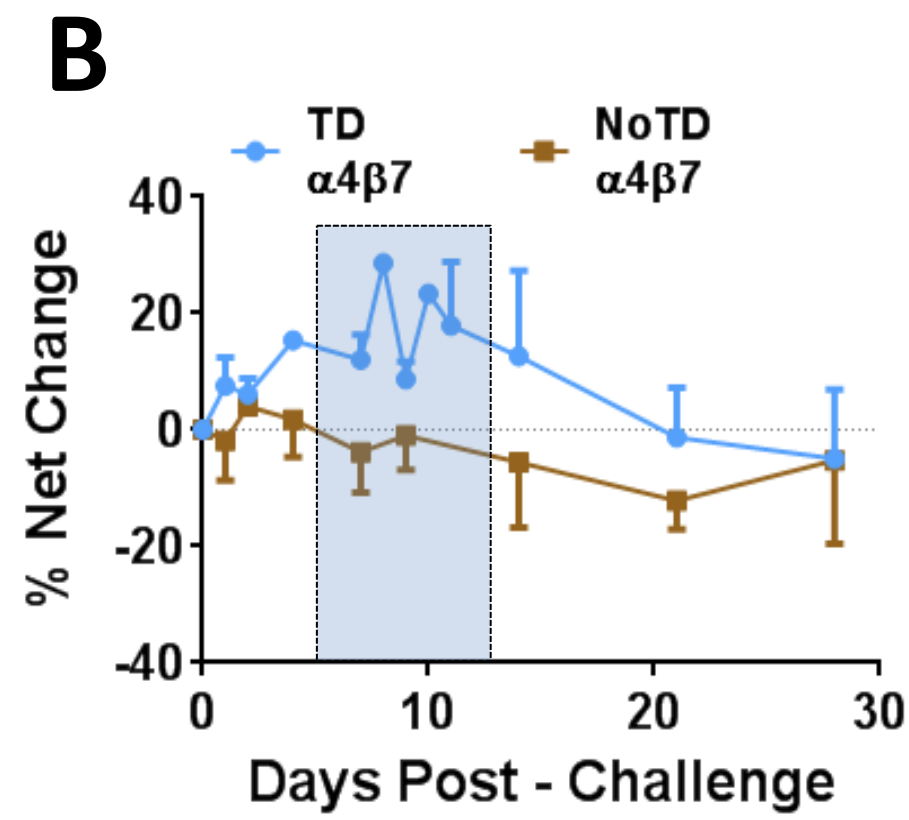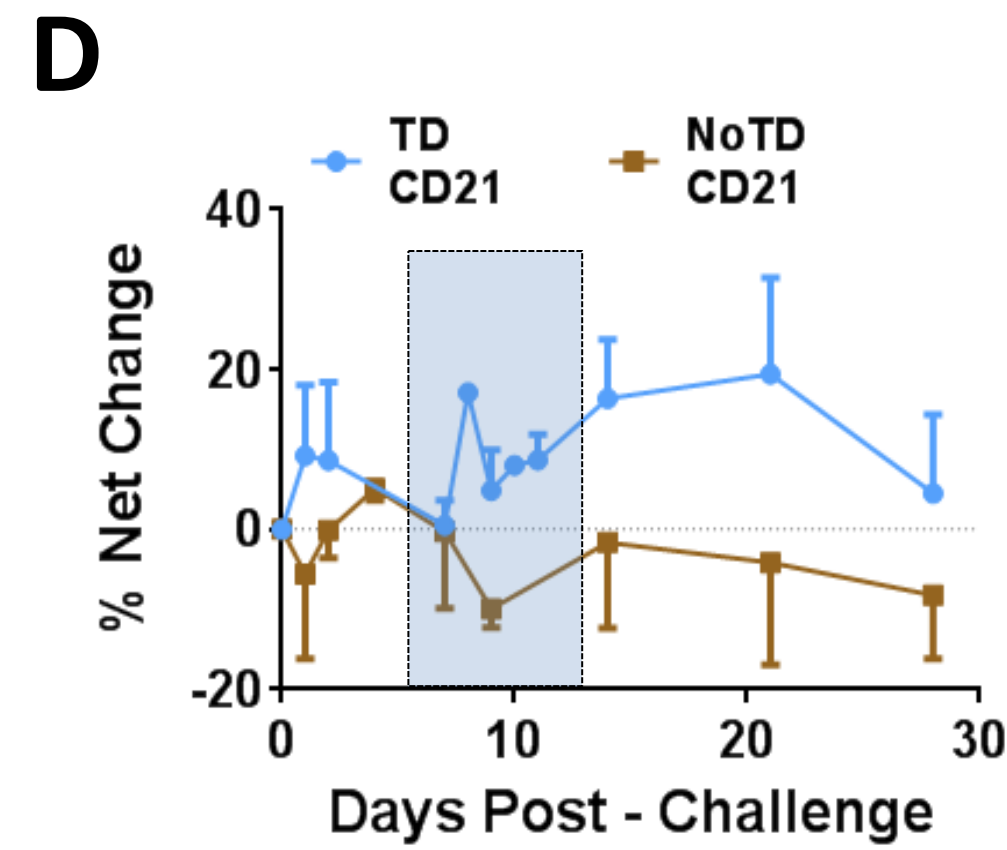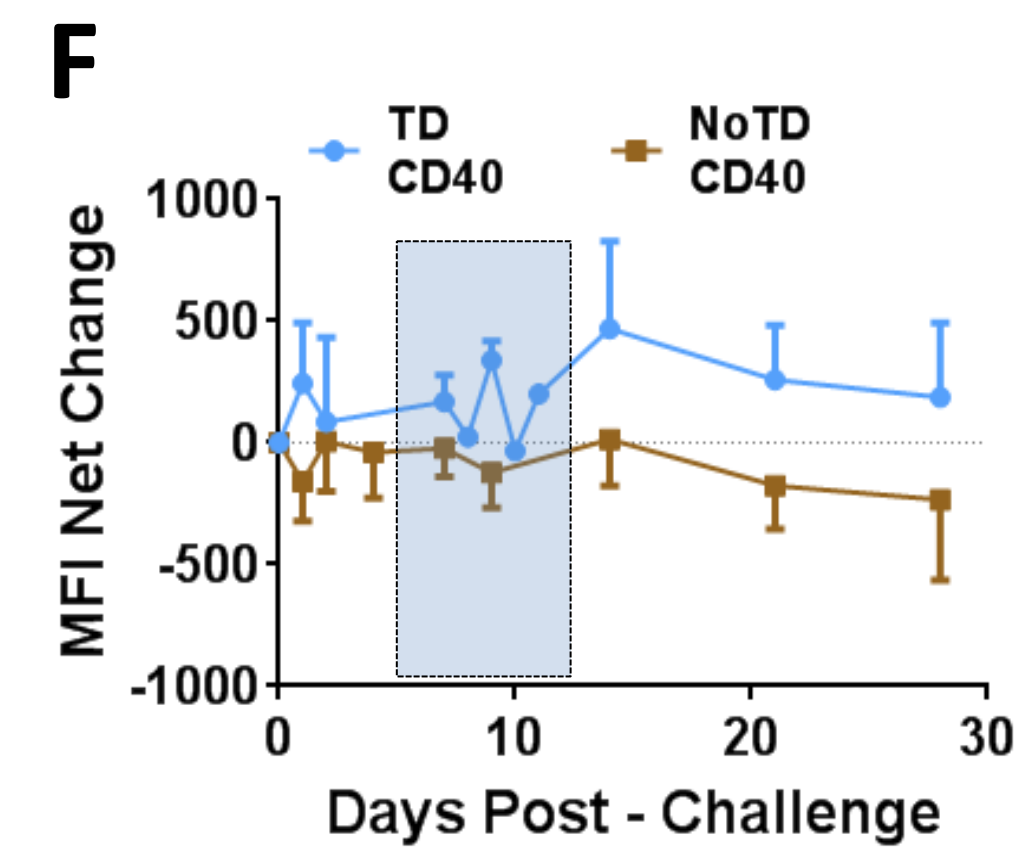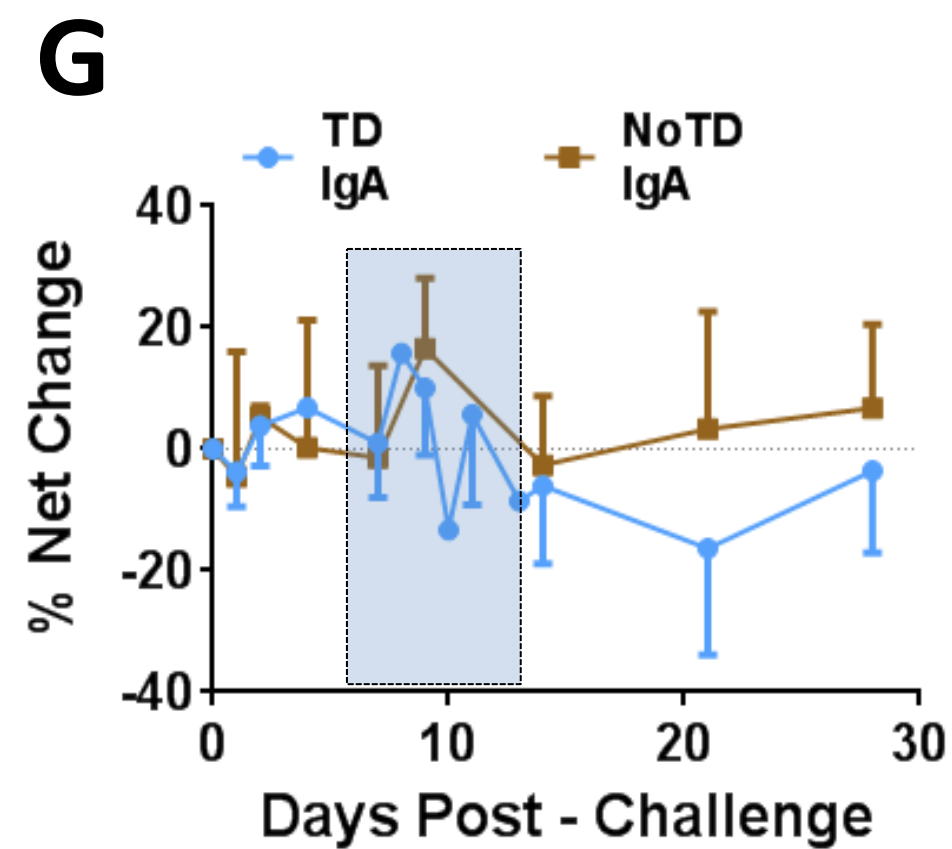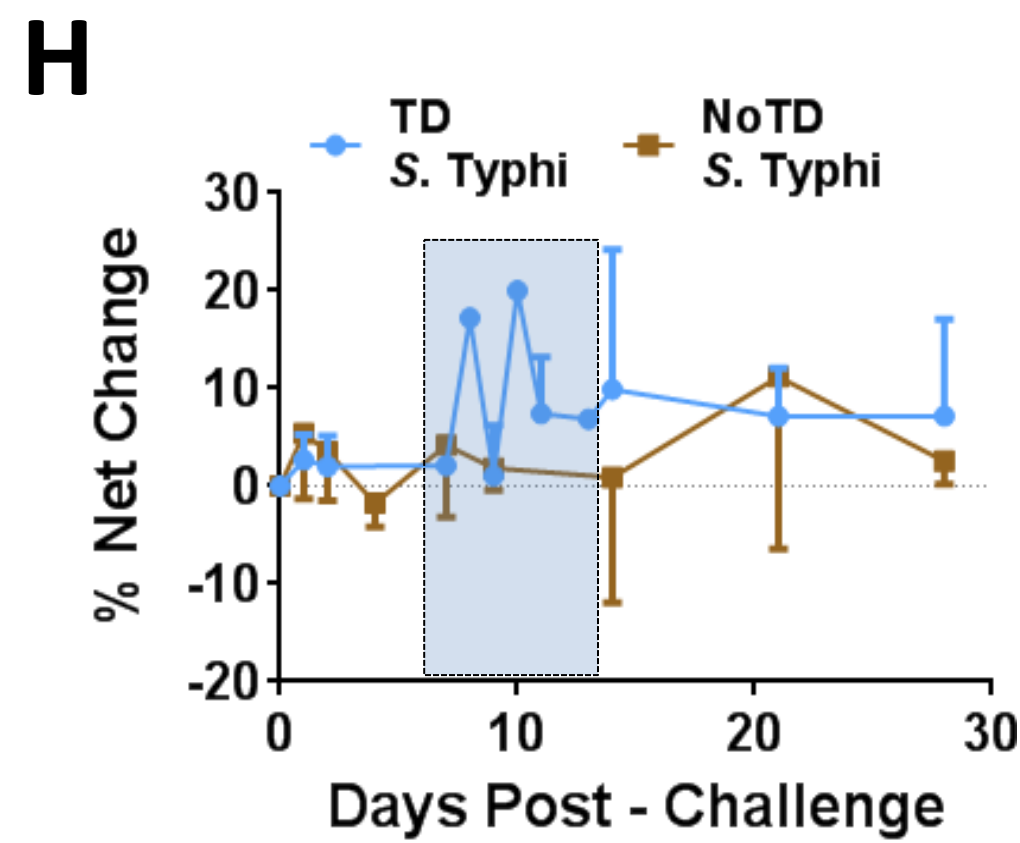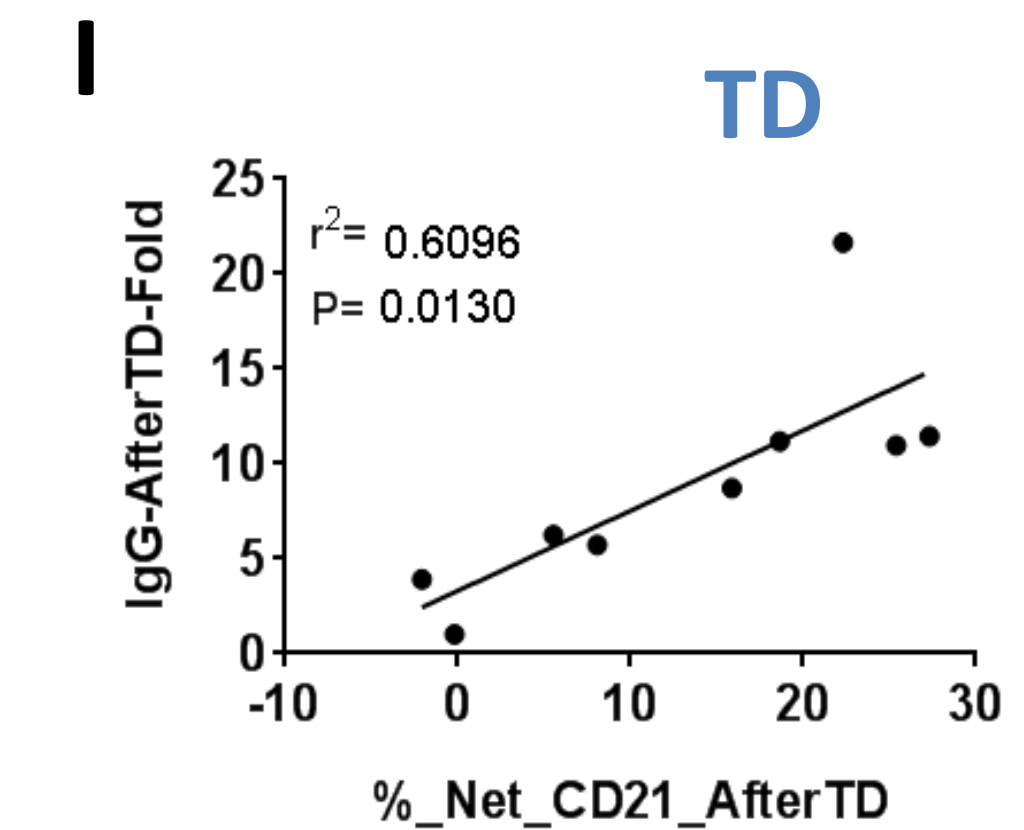

Supplement: pntd.0004766.s001.pdf [file pntd.0004766.s001.pdf]
