# Supplementary material for: Oral Challenge with Wild-Type Salmonella Typhi Induces Distinct Changes in B Cell Subsets in Individuals Who Develop Typhoid Disease
Source: PubMed Central journal article supplement (PMC4907489; doi:10.1371/journal.pntd.0004766), 2016-06-14
Supplement: pntd.0004766.s004.pdf [file pntd.0004766.s004.pdf]

## Markers evaluated

|                                  |                 | $\alpha 4\beta 7$                      | IgA                                   | CD40                                                      | CD21                                   | S. Typhi                                        |
|----------------------------------|-----------------|----------------------------------------|---------------------------------------|-----------------------------------------------------------|----------------------------------------|-------------------------------------------------|
| <b>B<sub>M</sub> Populations</b> | <b>Sm CD27+</b> | AroundTD<br>(Net%; P*=0.57)            | AroundTD<br>(Net%; P=0.18)<br>Fig S2F | AfterTD<br>(MdFI; P=0.13)                                 | AroundTD<br>(MdFI; P=0.040)<br>Fig 4B  | AroundTD & AfterTD<br>(Net%; P=0.96)<br>Fig S2H |
|                                  | <b>Sm CD27-</b> | AroundTD<br>(Net%; P=0.56)             | AroundTD<br>(Net%; P=0.44)<br>Fig S2G | AfterTD<br>(MdFI; P=0.42)                                 | AroundTD<br>(MdFI; P=0.0006)<br>Fig 4E | AroundTD & AfterTD<br>(Net%; P=0.77)<br>Fig S2I |
|                                  | <b>Um</b>       | AroundTD<br>(Net%; P=0.58)             | N/A                                   | AroundTD & AfterTD<br>(MdFI; P=0.043 & 0.034)<br>Fig 4H-I | AroundTD<br>(MdFI; P=0.15)             | AroundTD & AfterTD<br>(Net%; P=0.75)<br>Fig S2J |
|                                  | <b>Naïve</b>    | AroundTD<br>(Net%; P=0.0067)<br>Fig 5B | N/A                                   | AfterTD<br>(MdFI%; P=0.019)<br>Fig 5F                     | AroundTD<br>(MdFI; P=0.12)             | AroundTD & AfterTD<br>(Net%; P=0.26)<br>Fig S2K |

\* P-values for differences between TD and NoTD [Mixed effects model]

N/A: Non-available
