# Supplementary material for: Oral Challenge with Wild-Type Salmonella Typhi Induces Distinct Changes in B Cell Subsets in Individuals Who Develop Typhoid Disease
Source: PubMed Central journal article supplement (PMC4907489; doi:10.1371/journal.pntd.0004766), 2016-06-14
Supplement: pntd.0004766.s006.pdf [file pntd.0004766.s006.pdf]

**A** Gated on CD20+ LPS+ IgD+ CD27- (LPS+ Naïve) [TD volunteers]

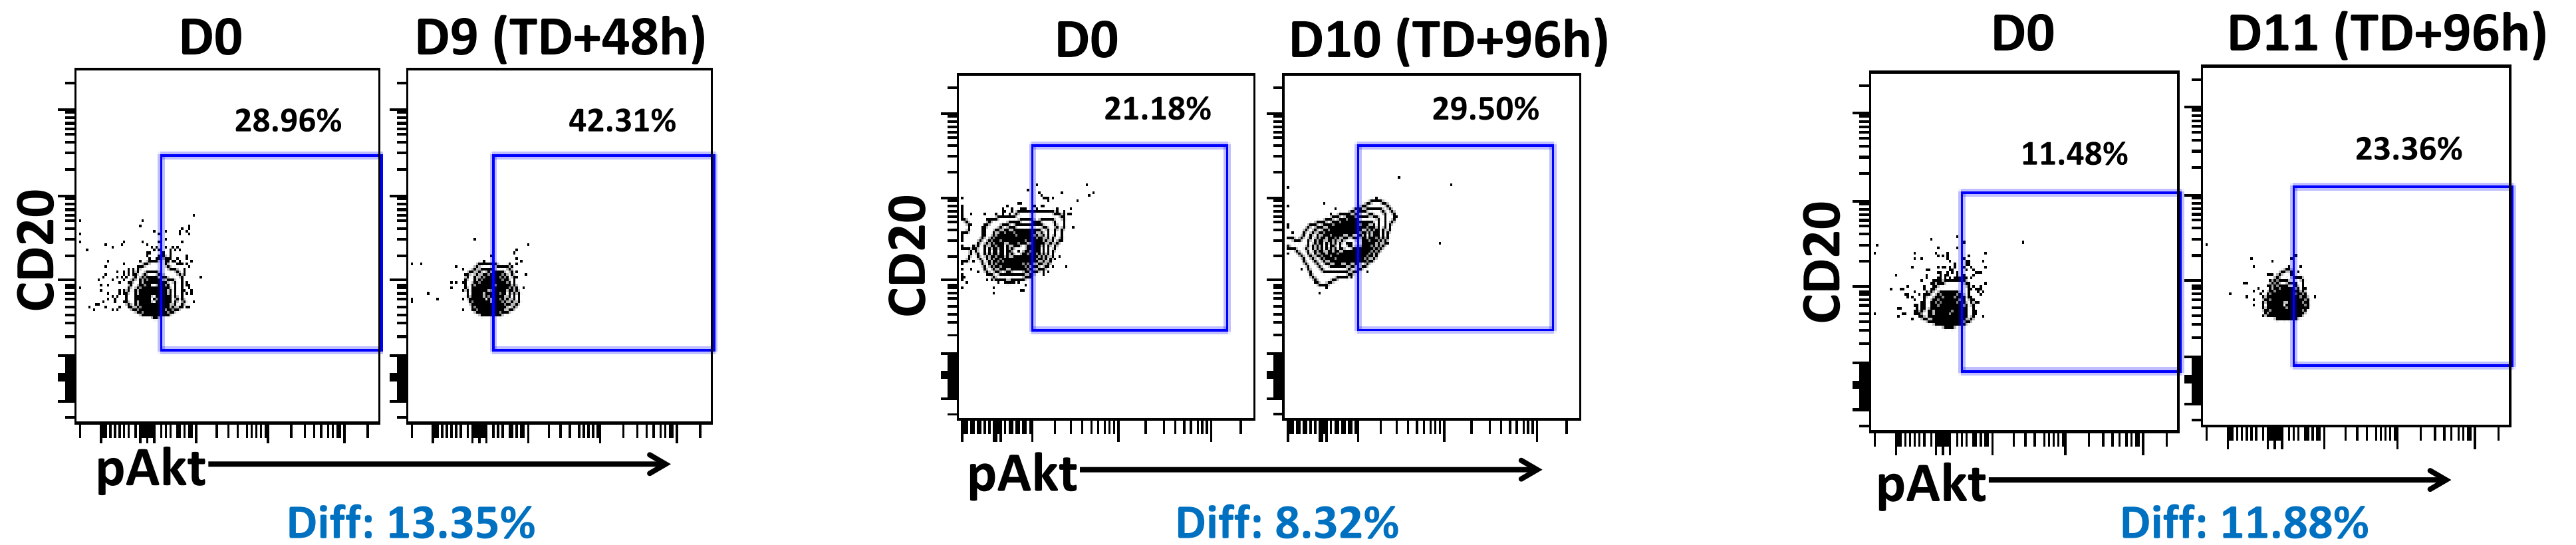

**B**

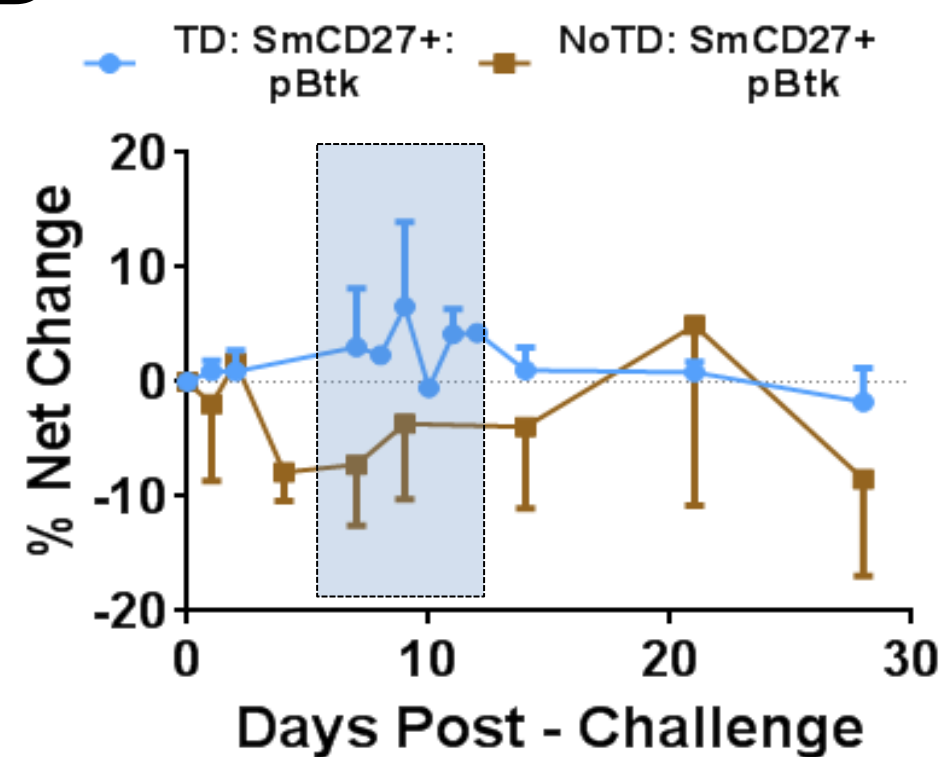

**C**

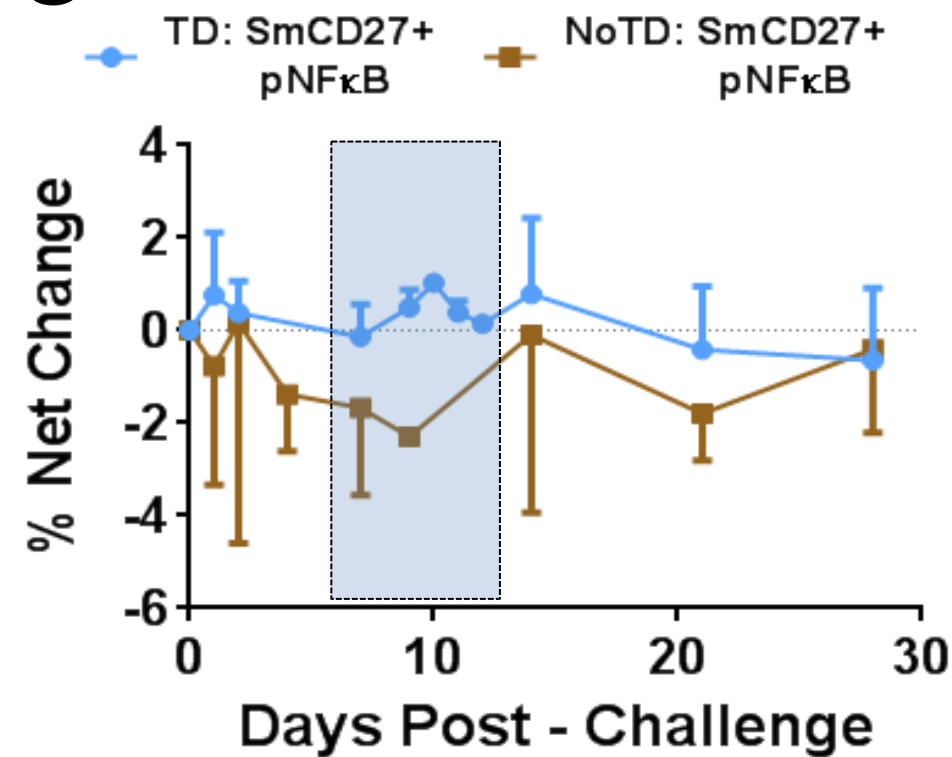

**D**

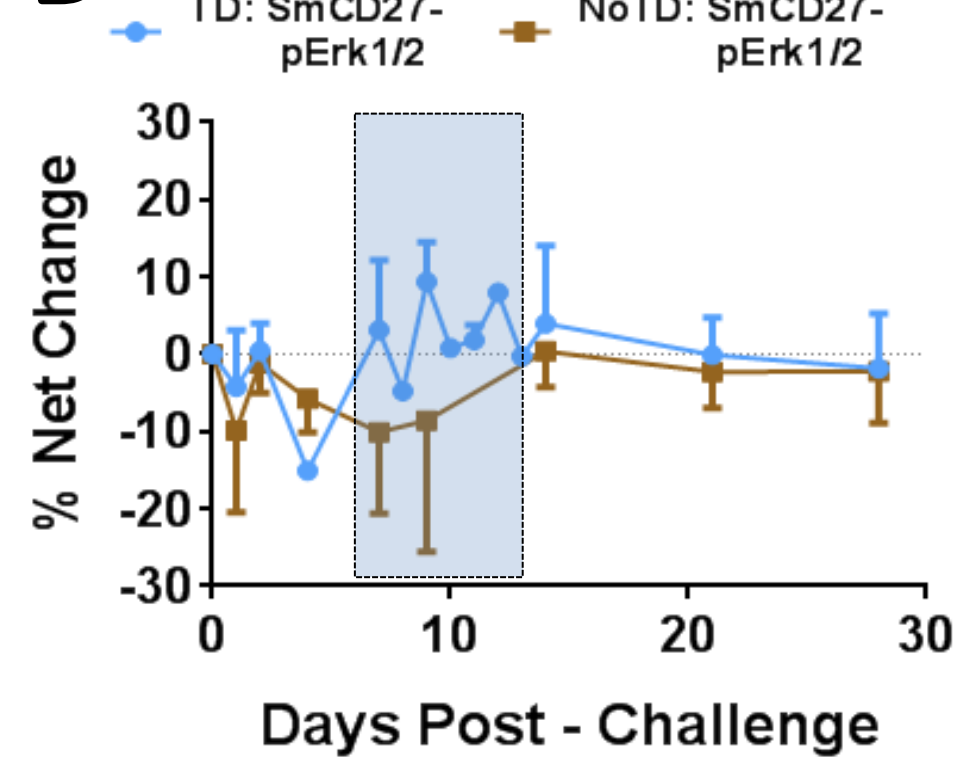

**E**

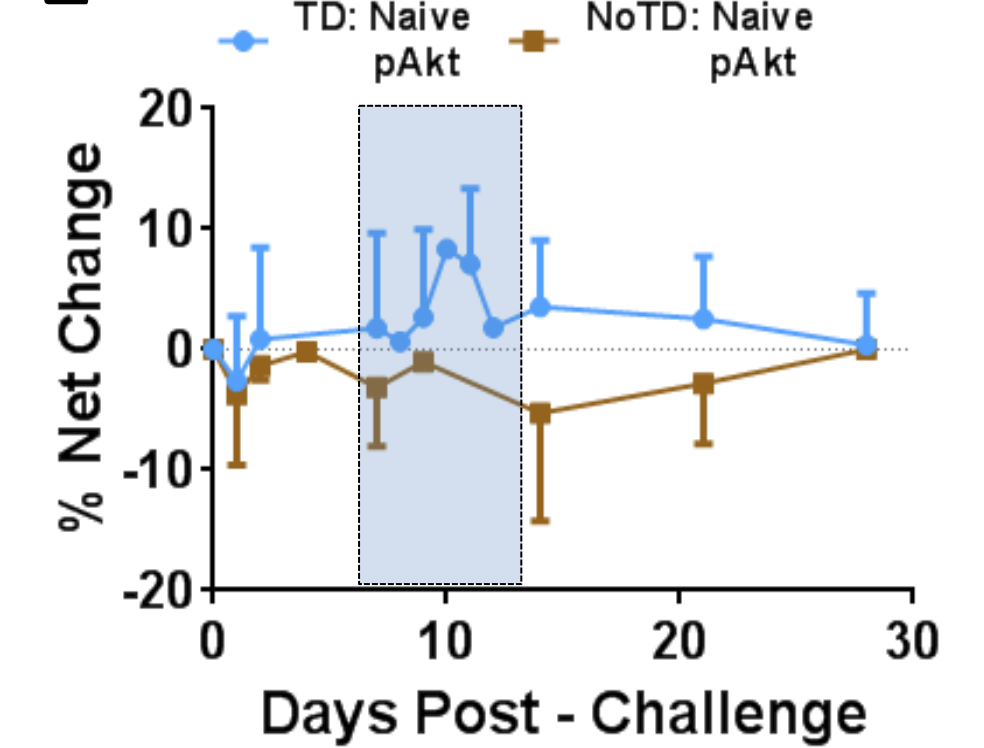

**F**

Markers evaluated

|          | pAkt                                   | pp38MAPK                    | pBtk                                   | pNFkB                                  | pErk1/2                                | pSyk                       |
|----------|----------------------------------------|-----------------------------|----------------------------------------|----------------------------------------|----------------------------------------|----------------------------|
| Sm CD27+ | AroundTD<br>(Net%; P*=0.61)            | AroundTD<br>(Net%; P=0.088) | AroundTD<br>(Net%; P=0.024)<br>Fig 7 B | AroundTD<br>(Net%; P=0.011)<br>Fig 7 E | AroundTD<br>(Net%; P=0.12)             | AroundTD<br>(Net%; P=0.13) |
| Sm CD27- | AroundTD<br>(Net%; P=0.93)             | AroundTD<br>(Net%; P=0.26)  | AroundTD<br>(Net%; P=0.21)             | AroundTD<br>(Net%; P=0.77)             | AroundTD<br>(Net%; P=0.037)<br>Fig 7 H | AroundTD<br>(Net%; P=0.11) |
| Um       | AfterTD<br>(Net%; P=0.50)              | AroundTD<br>(Net%; P=0.52)  | AroundTD<br>(Net%; P=0.35)             | AroundTD<br>(Net%; P=0.77)             | AroundTD<br>(Net%; P=0.17)             | AroundTD<br>(Net%; P=0.29) |
| Naïve    | AroundTD<br>(Net%; P=0.021)<br>Fig 7 K | AroundTD<br>(Net%; P=0.20)  | AroundTD<br>(Net%; P=0.48)             | AroundTD<br>(Net%; P=0.93)             | AroundTD<br>(Net%; P=0.31)             | AroundTD<br>(Net%; P=0.24) |

\* P-values for differences between TD and NoTD [Mixed effects model]

B<sub>M</sub> Populations
